# Supplementary material for: Enhanced anti-tumor efficacy and mechanisms associated with docetaxel-piperine combination- in vitro and in vivo investigation using a taxane-resistant prostate cancer model
Source: PubMed Central journal article supplement (PMC5790467; doi:10.18632/oncotarget.23235), 2017-12-14
Supplement: oncotarget-09-3338-s001.pdf [file oncotarget-09-3338-s001.pdf]

# Enhanced anti-tumor efficacy and mechanisms associated with docetaxel-piperine combination- *in vitro* and *in vivo* investigation using a taxane-resistant prostate cancer model

## SUPPLEMENTARY MATERIALS

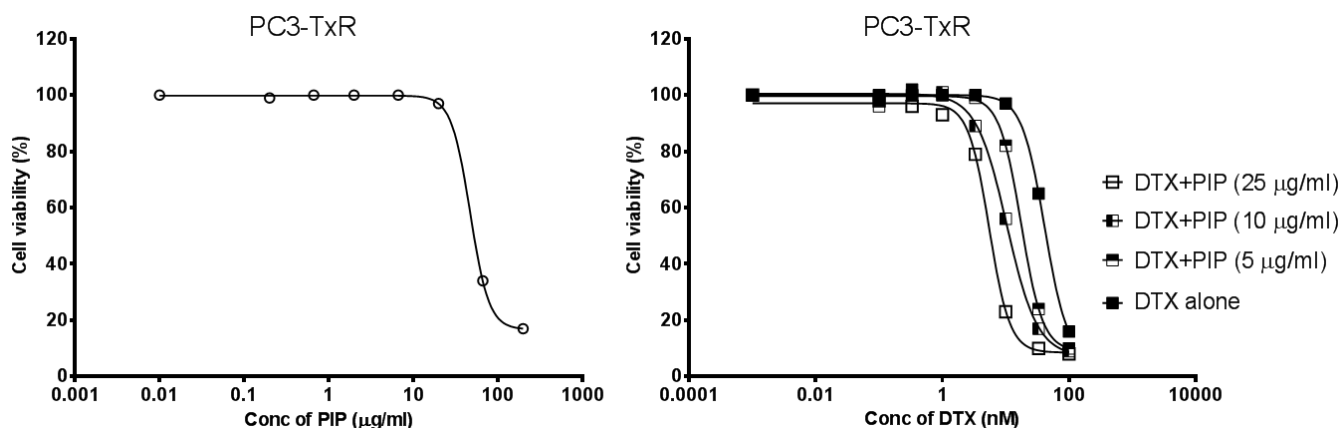

**Supplementary Figure 1: Cell viability (measured from triplicate samples) of PC3-TxR cells.** (A) The cytotoxicity of PIP on PC3-TxR (IC<sub>50</sub> 47.3 µg/ml); (B) The cytotoxicity of DTX on PC3-TxR alone or in combination with PIP at concentrations of 5, 10, and 25 µg/ml (IC<sub>50</sub> values of DTX are 41.4, 17.6, 10.4, and 5.5 nM for DTX alone, DTX + 5 µg/ml PIP, DTX + 10 µg/ml PIP, and DTX + 25 µg/ml PIP, respectively). Abbreviation: DTX = docetaxel; PIP = piperine.

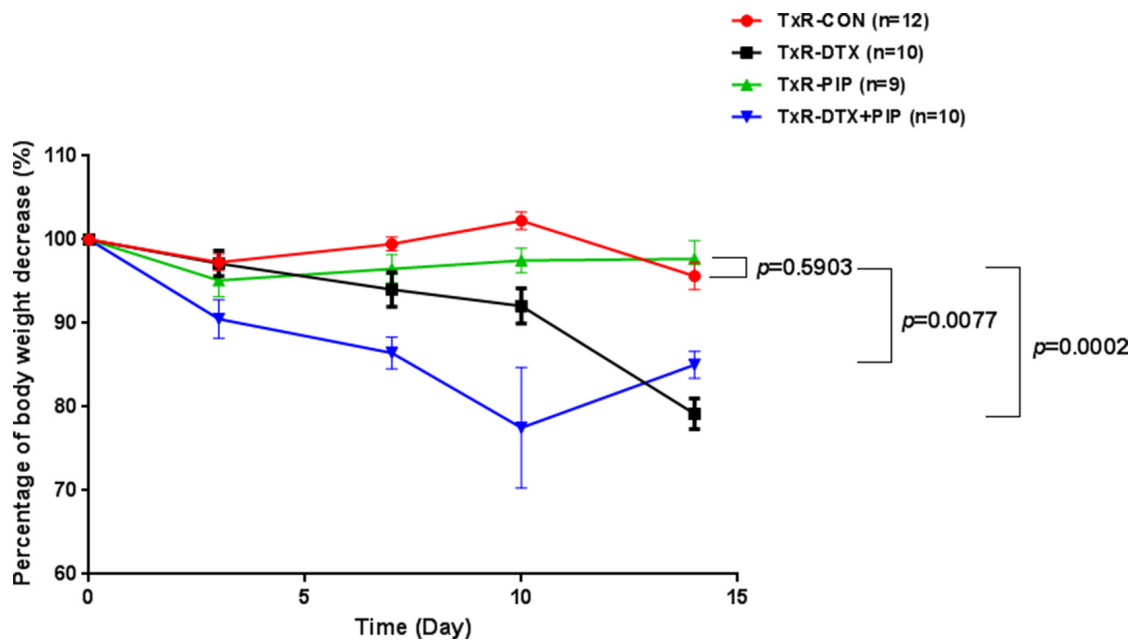

Supplementary Figure 2: Plot of percentage of body weight decrease (%) versus time (Day) in mice with TxR tumor xenografts after treatment with saline ( $n = 12$ ), DTX (20 mg/kg,  $n = 10$ ), PIP (50 mg/kg,  $n = 9$ ), or co-administration of DTX and PIP (20 mg/kg DTX and 50 mg/kg PIP,  $n = 10$ ). Abbreviation: DTX = docetaxel; PIP = piperine.

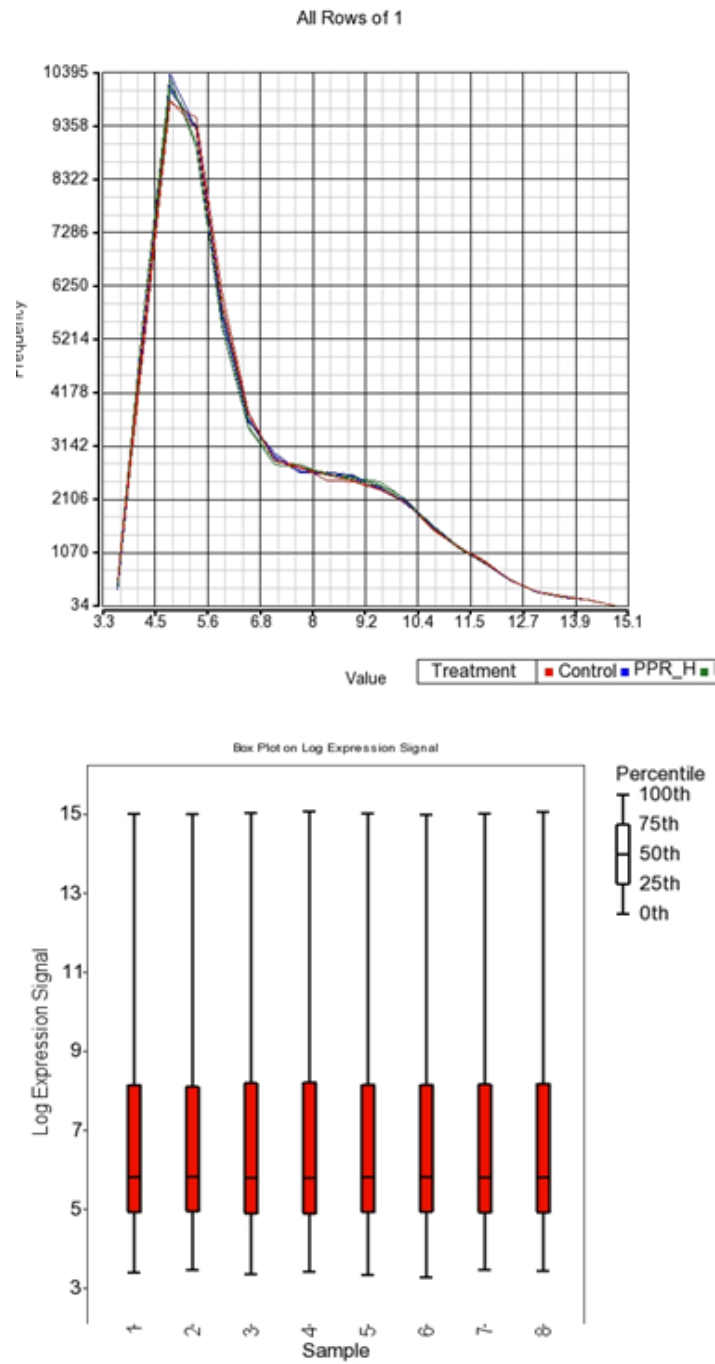

Supplementary Figure 3: Sample histograms (upper) and intensity distribution (bottom) of microarray data.

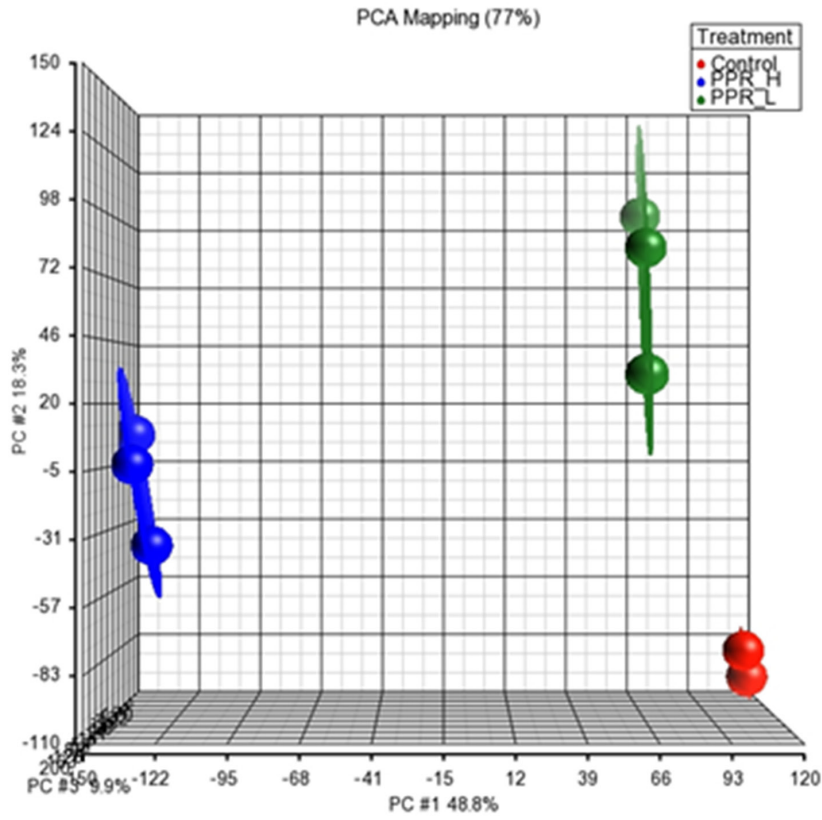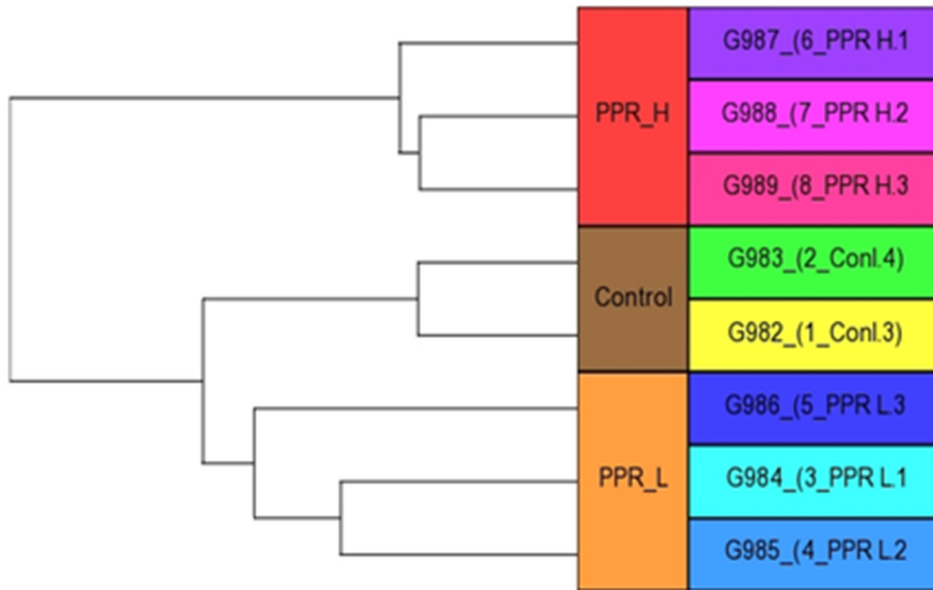

Supplementary Figure 4: PCA and hierarchical cluster analysis.

**Supplementary Table 1: IPA results for piperine high concentration treatment vs. control**

| <b>Top canonical pathways</b>  |                                                                                |                                  |                             |          |
|--------------------------------|--------------------------------------------------------------------------------|----------------------------------|-----------------------------|----------|
| <b>Regulation</b>              | <b>Name</b>                                                                    | <b><i>p</i>-value</b>            | <b>Overlap</b>              |          |
| <b>Up</b>                      | Unfolded protein response                                                      | 8.27E-06                         | 13.2%                       | (7/53)   |
|                                | Adipogenesis pathway                                                           | 5.24E-05                         | 7.4%                        | (9/122)  |
|                                | Cysteine Biosynthesis/Homocysteine Degradation                                 | 1.93E-04                         | 100.0%                      | (2/2)    |
|                                | Role of Macrophages, Fibroblasts and Endothelial Cells in Rheumatoid Arthritis | 2.05E-03                         | 3.9%                        | (11/282) |
|                                | VDR/RXR Activation                                                             | 4.39E-03                         | 6.5%                        | (5/77)   |
| <b>Down</b>                    | 14-3-3-mediated Signaling                                                      | 1.12E-04                         | 5.2%                        | (8/154)  |
|                                | Germ Cell-Sertoli Cell Junction Signaling                                      | 2.13E-04                         | 4.7%                        | (8/169)  |
|                                | Sertoli Cell-Sertoli Cell Junction Signaling                                   | 3.42E-04                         | 6.1%                        | (6/98)   |
|                                | p53 Signaling                                                                  | 3.52E-04                         | 7.8%                        | (5/64)   |
|                                | Remodeling of Epithelial Adherens Junctions                                    |                                  |                             |          |
| <b>Top upstream regulators</b> |                                                                                |                                  |                             |          |
| <b>Regulation</b>              | <b>Upstream regulator</b>                                                      | <b><i>p</i>-value of overlap</b> | <b>Predicted activation</b> |          |
| <b>Up</b>                      | tosedostat                                                                     | 7.18E-19                         | Activated                   |          |
|                                | ATF4                                                                           | 2.55E-13                         | Activated                   |          |
|                                | TRIB3                                                                          | 1.67E-11                         | Inhibited                   |          |
|                                | miR-30c-5p (and other miRNAs w/seed GUAAACA)                                   | 4.12E-11                         | Inhibited                   |          |
|                                | thapsigargin                                                                   | 5.20E-11                         | Activated                   |          |
| <b>Down</b>                    | miR-23a-3p (and other miRNAs w/seed UCACAUU)                                   | 1.91E-11                         | Activated                   |          |
|                                | miR-124-3p (and other miRNAs w/seed AAGGCAC)                                   | 1.08E-10                         | Activated                   |          |
|                                | miR-19b-3p (and other miRNAs w/seed GUGCAAA)                                   | 2.94E-08                         | Activated                   |          |
|                                | miR-200b-3p (and other miRNAs w/seed AAUACUG)                                  | 1.33E-07                         | Activated                   |          |
|                                | miR-26a-5p (and other miRNAs w/seed UCAAGUA)                                   | 2.01E-07                         | Activated                   |          |

**Supplementary Table 2: IPA results for piperine low concentration treatment vs. Control**

| <b>Top canonical pathways</b>  |                                                     |                                  |                             |         |
|--------------------------------|-----------------------------------------------------|----------------------------------|-----------------------------|---------|
| <b>Regulation</b>              | <b>Name</b>                                         | <b><i>p</i>-value</b>            | <b>Overlap</b>              |         |
| <b>Up</b>                      | HIF1 Signaling                                      | 2.45E-03                         | 3.00%                       | (3/100) |
|                                | Tight Junction Signaling                            | 9.69E-03                         | 1.80%                       | (3/164) |
|                                | Hutington's Disease Signaling                       | 2.25E-02                         | 1.30%                       | (3/225) |
|                                | Guanosine Nucleotides Degradation III               | 3.44E-02                         | 7.70%                       | (1/13)  |
|                                | Urate Biosynthesis/Inosine 5'-phosphate Degradation | 3.70E-02                         | 7.10%                       | (1/14)  |
| <b>Down</b>                    | Bupropion Degradation                               | 7.28E-04                         | 8.30%                       | (2/24)  |
|                                | Acetone Degradation I (to Methylglyoxal)            | 7.90E-04                         | 8.00%                       | (2/25)  |
|                                | HMGB1 Signaling                                     | 9.84E-04                         | 2.50%                       | (3/118) |
|                                | Atherosclerosis Signaling                           | 9.84E-04                         | 2.50%                       | (3/118) |
|                                | Estrogen Biosynthesis                               | 1.55E-03                         | 5.70%                       | (2/35)  |
| <b>Top upstream regulators</b> |                                                     |                                  |                             |         |
| <b>Regulation</b>              | <b>Upstream regulator</b>                           | <b><i>p</i>-value of overlap</b> | <b>Predicted activation</b> |         |
| <b>Up</b>                      | PPARG                                               | 1.58E-08                         | Activated                   |         |
|                                | troglitazone                                        | 2.02E-06                         | Activated                   |         |
|                                | fluticasone                                         | 4.15E-06                         |                             |         |
|                                | PLAGL1                                              | 6.72E-06                         |                             |         |
|                                | Insulin                                             | 6.74E-06                         |                             |         |
| <b>Down</b>                    | CD40                                                | 1.84E-10                         |                             |         |
|                                | 5-hydroxytryptamine                                 | 4.10E-10                         | Inhibited                   |         |
|                                | TREM1                                               | 5.36E-10                         |                             |         |
|                                | TNF                                                 | 6.54E-10                         |                             |         |
|                                | U0126                                               | 9.03E-10                         |                             |         |

**Supplementary Table 3: Drug administrations for each treatment group with different cell xenografts**

| <b>Treatment Groups</b> | <b>Cell xenografts</b> | <b>Drug administration</b>                                            |
|-------------------------|------------------------|-----------------------------------------------------------------------|
| PC3-CON                 | PC3                    | Vehicle, Daily, p.o.                                                  |
| PC3-DTX                 | PC3                    | DTX, 20 mg/kg, once a week, i.v.                                      |
| TxR-CON                 | PC3-TxR                | Vehicle, Daily, p.o.                                                  |
| TxR-DTX                 | PC3-TxR                | DTX, 20 mg/kg, once a week, i.v.                                      |
| TxR-PIP                 | PC3-TxR                | PIP, 50 mg/kg, daily, p.o.                                            |
| TxR-DTX+PIP             | PC3-TxR                | DTX at 20 mg/kg (once a week, i.v.) and PIP at 50 mg/kg (daily, p.o.) |

Abbreviation: DTX = docetaxel; PIP = piperine.
